# Supplementary material for: Prenatal Caffeine Exposure Is Linked to Elevated Sugar Intake and BMI, Altered Reward Sensitivity, and Aberrant Insular Thickness in Adolescents: An ABCD Investigation
Source: MDPI journal article supplement (doi:10.3390/nu14214643), 2022-11-03
Supplement: s1 [file s1]

**Table S1.** Associations Between Prenatal Caffeine Exposure, and Gram Intake of Sugar Sources.

| Food Items (gm)             | Daily vs. No<br>( $\beta$ ; 95% CI; $p$ ) | Weekly vs. No<br>( $\beta$ ; 95% CI; $p$ ) | Less than Weekly vs. No<br>( $\beta$ ; 95% CI; $p$ ) |
|-----------------------------|-------------------------------------------|--------------------------------------------|------------------------------------------------------|
| soft drinks                 | 30.37; 21.45 – 39.29; <0.001*             | 12.77; 3.47 – 22.07; 0.007                 | 8.92; -1.08 – 18.93; 0.08                            |
| Applesauce Canned fruit     | -2.41; -4.19 – -0.64; 0.008               | -1.59; -3.45 – 0.25; 0.09                  | -1.69; -3.69 – 0.30; 0.09                            |
| Fruit juice                 | 3.56; -4.25 – 11.38; 0.37                 | -4.96; -13.12 – 3.19; 0.23                 | -0.41; -9.19 – 8.37; 0.92                            |
| Apple banana orange (Fruit) | -2.34; -6.61 – 1.91; 0.28                 | -1.43; -5.88 – 3.01; 0.52                  | -3.85; -8.64 – 0.93; 0.11                            |
| Any other fruit             | -1.81; -4.84 – 1.20; 0.23                 | -1.83; -4.99 – 1.31; 0.25                  | 0.39; -2.99 – 3.79; 0.81                             |
| Ketchup salsa               | 0.14; -0.11 – 0.39; 0.26                  | 0.04; -0.21 – 0.31; 0.73                   | -0.005; -0.29 – 0.28; 0.97                           |
| Ice-cream                   | 1.08; -1.29 – 3.45; 0.37                  | 1.27; -1.20 – 3.75; 0.31                   | 1.96; -0.70 – 4.63; 0.15                             |
| Candy bars                  | 0.28; -0.17 – 0.74; 0.23                  | -0.31; -0.79 – 0.16; 0.19                  | 0.24; -0.26 – 0.76; 0.34                             |
| Cookie donut cake           | 0.75; 0.03 – 1.48; 0.03                   | 0.52; -0.23 – 1.27; 0.17                   | 0.66; -0.14 – 1.47; 0.11                             |
| Cereal with sweet           | 0.48; -0.25 – 1.22; 0.19                  | 0.32; -0.44 – 1.09; 0.41                   | -0.22; -1.05 – 0.60; 0.59                            |
| Milk chocolate              | 4.35; 0.19 – 8.5; 0.04                    | 0.19; -4.1 – 4.53; 0.93                    | 2.3; -2.31 – 7.03; 0.32                              |
| Breakfast protein bars      | -0.10; -0.95 – 0.74; 0.80                 | -0.01; -0.90 – 0.87; 0.97                  | -0.37; -1.33 – 0.57; 0.43                            |
| Wholewheat bread            | -0.83; -1.75 – 0.07; 0.07                 | -0.27; -1.23 – 0.68; 0.57                  | -1.20; -2.23 – -0.17; 0.02                           |

**Note:** Here, \*denotes significance that survived Bonferroni-correction for multiple comparisons with  $p < 0.05$ .
